# Supplementary material
Source: MDPI journal article supplement (https://www.mdpi.com/2075-163X/13/12/1470)
Supplement: s1 [file s1]

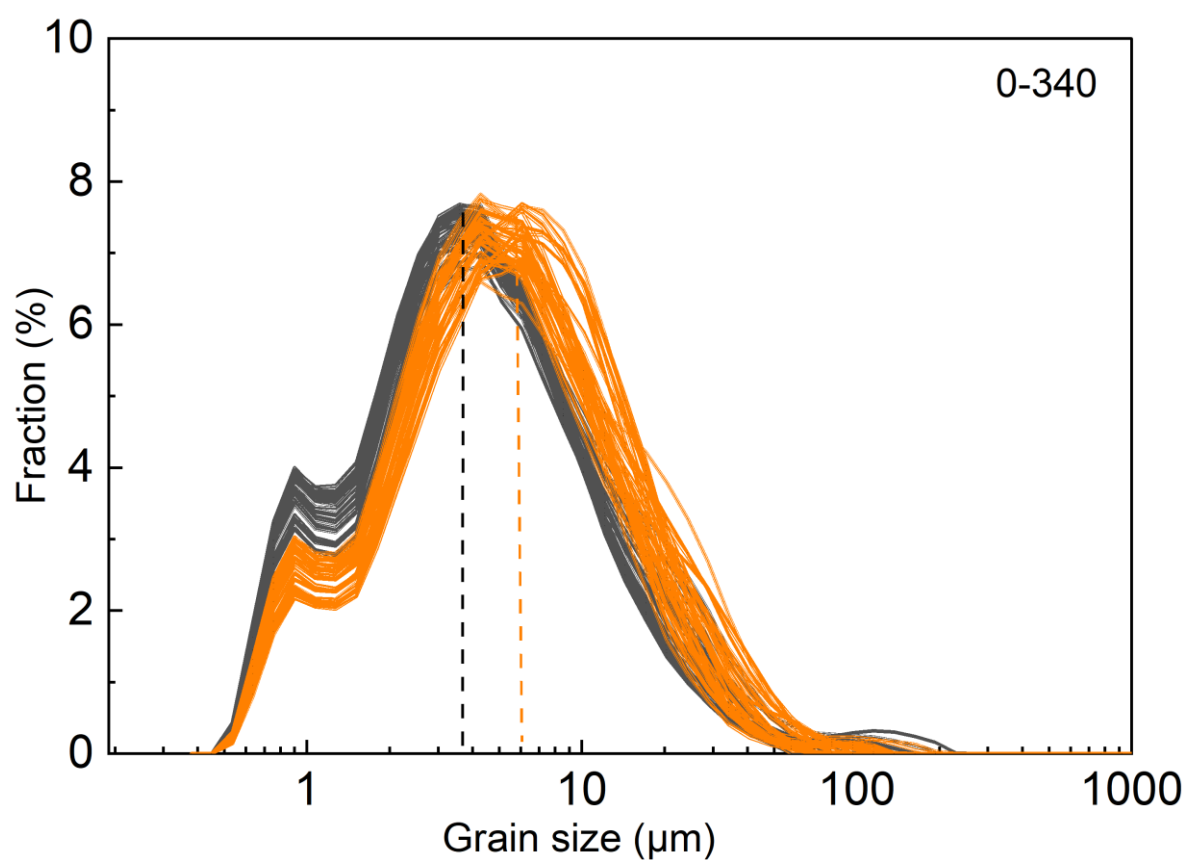

**Figure S1.** GSD analyses of normal samples (unit 1 and unit 2) of the core. The black line represents for the original samples and the orange line represents for the acidified samples.
